# Supplementary material for: Phytochemical Profiling and Antioxidant Potential of Phlomoides rotata Essential Oils: Insights into Bioactive Constituents
Source: Research Square preprint supplement (doi:10.21203/rs.3.rs-7155967/v1), 2025-09-15
Supplement: Supplementary file 1 [file 5c3c4068eedeae9a1ea821ed.docx]

| Compounds | CAS# | Linear retention indices (LRIs)a | LRIs c | Retention time (RT) (min)12 | LRIsb11 | Content | | | | | | | | | | |
| --- | --- | --- | --- | --- | --- | --- | --- | --- | --- | --- | --- | --- | --- | --- | --- | --- |
| Aboveground12 | Underground12 | Flower11 | | | Leaf11 | | | Root11 | | |
| Tibet | Yunnan | Qinghai | Tibet | Yunnan | Qinghai | Tibet | Yunnan | Qinghai |
| Fatty acids (9, 8, 4) |  |  |  |  |  | 68.9 | 65.41 | 20.22 | 29.47 | 38.66 | 13.66 | 22.74 | 27.3 | 17.71 | 44.81 | 46.27 |
| Hexanoic acid (6:0) | 142-62-1 | 990 | 1846 | 4.21 | - | 0.36 | - | - | - | - | - | - | - | - | - | - |
| Caprylic acid (8:0) | 124-07-2 | 1180 | 2060 | 5.4 | - | 0.8 | - | - | - | - | - | - | - | - | - | - |
| Dodecanoic acid (12:0) | 143-07-7 | 1568 | 2497 | 8.89 | - | 0.37 | 0.78 | - | - | - | - | - | - | - | - | - |
| Myristic acid(14:0) | 544-63-8 | 1768 | 2694 | 11.41 | 1765 | 1.45 | 1.02 | 0.94 | 2.77 | 4.09 | 1.81 | 2.26 | 2.8 | nd | 1.4 | 1.96 |
| Pentadecanoic acid (15:0) | 1002-84-2 | 1867 | 2822 | 12.81 | - | 1.26 | 0.83 | - | - | - | - | - | - | - | - | - |
| 9-Hexadecenoic acid (16:1, n-7) | 2091-29-4 | 1942 | 2954 | 14.6 | - | 6.2 | 4.35 | - | - | - | - | - | - | - | - | - |
| Palmitic acid(16:0) | 57-10-3 | 1968 | 2931 | 14.38 | 1967 | 50.9 | 34.51 | 9.97 | 11.25 | 14.98 | 7.08 | 12.42 | 12.22 | 9.65 | 16.95 | 18.54 |
| Linoleic acid(18:2, n-6) | 60-33-3 | 2133 | 3164 | 17.79 | - | 7.56 | 23.92 | 6.9 | 11.38 | 15.78 | 2.75 | 3.54 | 9.36 | 8.06 | 18.63 | 19.11 |
| Stearic acid (18:0) | 57-11-4 | 2172 | 3136 | - | - | - | - | 2.41 | 4.07 | 3.81 | 2.02 | 4.52 | 2.92 | tr | 7.83 | 6.66 |
| Monoterpenoid alcohols (1) |  |  |  |  |  |  |  | 0 | 0 | 0 | 0.18 | 0 | 0 | 0 | 0 | 0 |
| Linalool | 78-70-6 | 1099 | 1547 | - | 1103 | - | - | nd | nd | nd | 0.18 | nd | nd | nd | nd | nd |
| Norisoprenoids (1, 0, 1) |  |  |  |  |  | 0 | 0 | 0.49 | 0.54 | 0.55 | 0.91 | 0.73 | 0.81 | 0 | 0 | 0 |
| C18-norisoprenoids (1, 0, 1) |  |  |  |  |  | 0 | 0 | 0.49 | 0.54 | 0.55 | 0.91 | 0.73 | 0.81 | 0 | 0 | 0 |
| Hexahydrofarnesyl acetone | 502-69-2 | 1844 | 2131 | - | 1853 | - | - | 0.49 | 0.54 | 0.55 | 0.91 | 0.73 | 0.81 | nd | nd | nd |
| Diterpenoid alcohols (1, 0, 1) |  |  |  |  |  |  |  | 0 | 0.64 | 0.22 | 2.1 | 1.56 | 1.43 | 0 | 0 | 0.64 |
| Phytol | 150-86-7 | 2114 | 2622 | - | - | - | - | nd | 0.64 | 0.22 | 2.1 | 1.56 | 1.43 | nd | nd | nd |
| Alkanes (22, 0, 22) |  |  |  |  |  |  |  | 37.8 | 21.2 | 19.79 | 29.41 | 19.17 | 16.35 | 31.32 | 4.98 | 4.6 |
| n-Undecane | 1120-21-4 | 1100 | 1100 | - | 1103 | - | - | nd | 0.52 | tr | nd | 0.25 | 0.61 | nd | 0.43 | 0.48 |
| Dodecane | 112-40-3 | 1200 | 1200 | - | 1202 |  |  | nd | 0.1 | tr | nd | tr | tr | nd | 0.11 | 0.12 |
| *n*-Tetradecane | 629-59-4 | 1400 | 1400 | - | 1401 | - | - | 1.16 | 0.14 | 0.15 | nd | 0.41 | 0.19 | 2 | 0.8 | 0.25 |
| *n*-Pentadecane | 629-62-9 | 1500 | 1500 | - | 1502 | - | - | 3.48 | 1.18 | 0.59 | nd | 2.07 | 1.06 | 5.71 | 2.07 | 1.15 |
| *n*-Cetane | 544-76-3 | 1600 | 1600 | - | 1604 | - | - | 4.13 | 0.17 | 0.12 | 2.23 | 0.79 | 0.21 | 7.17 | 0.77 | 0.24 |
| *n*-Heptadecane | 629-78-7 | 1700 | 1700 | - | 1704 | - | - | 3.68 | 0.37 | tr | 2.73 | 0.68 | 0.38 | 7.69 | 0.6 | 0.26 |
| *n*-Octadecane | 593-45-3 | 1800 | 1800 | - | 1804 | - | - | 2.24 | nd | nd | 1.57 | nd | nd | 4.93 | tr | tr |
| *n*-Nonadecane | 629-92-5 | 1900 | 1900 | - | - | - | - | 1.87 | 0.18 | 0.13 | 1.6 | 0.13 | 0.1 | 1.58 | nd | nd |
| *n*-Eicosane | 112-95-8 | 2000 | 2000 | - | 2000 | - | - | 0.75 | nd | nd | 0.57 | nd | nd | 1.5 | nd | nd |
| *n*-Heneicosane | 629-94-7 | 2100 | 2100 | - | - | - | - | nd | nd | nd | nd | nd | nd | 0.74 | nd | nd |
| *n*-Docosane | 629-97-0 | 2200 | 2200 | - | - | - | - | 0.42 | nd | nd | nd | nd | nd | nd | nd | nd |
| *n*-Tricosane | 638-67-5 | 2300 | 2300 | - | - | - | - | 1.03 | 0.54 | nd | nd | 0.45 | nd | nd | 0.2 | nd |
| *n*-Tetracosane | 646-31-1 | 2400 | 2400 | - | - | - | - | 0.78 | 0.44 | 0.3 | 0.6 | 0.37 | 0.19 | nd | nd | 0.11 |
| *n*-Pentacosane | 629-99-2 | 2500 | 2500 | - | - | - | - | 1.72 | 1.07 | 0.76 | 0.86 | 0.29 | nd | nd | nd | 0.13 |
| *n*-Hexacosane | 630-01-3 | 2600 | 2600 | - | - | - | - | 0.63 | 0.59 | 0.5 | 0.67 | 0.44 | nd | nd | nd | 0.16 |
| n-Heptacosane | 593-49-7 | 2700 | 2700 | - | - | - | - | 2.82 | 2.50 | 2 | 0.98 | 0.53 | 0.49 | nd | nd | tr |
| n-Octacosane | 630-02-4 | 2800 | 2800 | - | - | - | - | 0.84 | 0.53 | 0.5 | 0.48 | 0.39 | nd | nd | nd | nd |
| n-Nonacosane | 630-03-5 | 2900 | 2900 | - | - | - | - | 4.33 | 4.77 | 4.8 | 3.29 | 2.86 | 2.33 | nd | nd | nd |
| n-Triacontane | 638-68-6 | 3000 | 3000 | - | - | - | - | 0.8 | nd | nd | 0.83 | nd | nd | nd | nd | nd |
| n-Hentriacontane | 630-04-6 | 3100 | 3100 | - | - | - | - | 4.08 | 6.73 | 7.76 | 7.18 | 8.58 | 8.45 | nd | nd | 0.45 |
| n-Dotriacontane | 544-85-4 | 3200 | 3200 | - | - | - | - | nd | nd | nd | 0.74 | nd | nd | nd | nd | nd |
| n-Tritriacontane | 630-05-7 | 3300 | 3300 | - | - | - | - | 3.04 | 1.37 | 2.18 | 5.08 | 0.93 | 2.34 | nd | nd | 1.25 |
| Others (10, 2, 8) |  |  |  |  |  | 0.16 | 0.76 | 0.67 | 3.98 | 3.39 | 4.24 | 4.16 | 3.34 | 2.32 | 1.87 | 2.37 |
| *α*-Pinene | 80-56-8 | 937 | 1028 | - | 940 | - | - | 0.22 | nd | nd | 0.23 | nd | nd | nd | nd | nd |
| 2-hydroxy-benzaldehyde | 90-02-8 | 1047 | 1672 | 3.71 | - | - | 0.76 | - | - | - | - | - | - | - | - | - |
| Benzeneethanol | 60-12-8 | 1116 | 1906 | - | 1120 | - | - | nd | nd | nd | 0.15 | nd | nd | nd | nd | nd |
| Naphthalene | 91-20-3 | 1182 | 1745 | - | 1195 | - | - | tr | nd | nd | tr | nd | nd | nd | nd | nd |
| 2,4-Di-tert-butylphenol | 96-76-4 | 1519 | 2318 | - | 1539 | - | - | nd | 2.09 | 1.96 | 1.85 | 2.86 | 1.67 | 2.32 | 1.48 | 2.2 |
| 1-Tridecanol | 112-70-9 | 1577 | 2074 | - | 1582 | - | - | nd | nd | nd | 0.51 | nd | nd | nd | nd | nd |
| Cedrol | 77-53-2 | 1598 | 2116 | 7.25 | - | 0.16 | - | - | - | - | - | - | - | - | - | - |
| Diisobutyl adipate | 141-04-8 | 1695 | 2126 | - | 1690 | - | - | 0.45 | nd | nd | 0.66 | nd | nd | nd | nd | nd |
| 9-Octadecenamide | 3322-62-1 | 2334 | - | - | - | - | - | nd | 1.12 | 1.14 | 0.28 | 0.14 | 1.67 | nd | 0.39 | 0.17 |
| Squalene | 111-02-4 | 2832 | 2865 | - | - | - | - | nd | 0.77 | 0.29 | 0.56 | 1.16 | nd | nd | nd | nd |
| Debated (37, 7, 30) |  |  |  |  |  | 24.65 | 29.3 | 36.92 | 41.14 | 35.89 | 44.94 | 48.13 | 48.65 | 46.66 | 46.36 | 45.46 |
| Hydroxyproline | 51-35-4 | - | - | 11.07 | - | 4.63 | - | - | - | - | - | - | - | - | - | - |
| Cyclohexenylacetic acid | - | - | - | - | - | - | - | 2.41 | 4.07 | 3.36 | nd | tr | tr | nd | nd | nd |
| 12-methyl-tetradecanoic acid | 5502-94-3 | - | - | 12.38 | - | 0.46 | 0.19 | - | - | - | - | - | - | - | - | - |
| 14-Pentadecenoic acid (15:1, n-1) | 17351-34-7 | - | - | 12.98 | - | 3.21 | 2.60 | - | - | - | - | - | - | - | - | - |
| Oleic acid (18:1, n-9) | 112-80-1 | 2141 | 3173 | 17.4 | - | 13.44 | 11.05 | - | - | - | - | - | - | - | - | - |
| 7-Methyl-cyclopentapyran-4-carboxylic acid methylester | - | - | - | - | 1611 | - | - | nd | nd | nd | 0.53 | nd | nd | nd | nd | nd |
| Methyl linolenate | 301-00-8 | 2098 | 2571 | - | - | - | - | 11.9 | 10.63 | 8.77 | 11.19 | 11.55 | 18.23 | 18.38 | 20.8 | 17.31 |
| Ethyl linoleate | 544-35-4 | 2162 | 2521 | 18.48 | - | 1.7 | 14.36 | - | - | - | - | - | - | - | - | - |
| Glyceryl monostearate | - | - | - | - | - | - | - | 0.33 | nd | nd | nd | nd | nd | nd | nd | nd |
| *n*-Octane | 111-65-9 | 800 | 800 | - | 818 | - | - | nd | 0.13 | tr | 0.47 | 0.11 | 0.16 | nd | 0.22 | 0.12 |
| Dimethyl heptane | - | - | - | - | 837 | - | - | nd | tr | nd | nd | tr | tr | nd | 0.18 | tr |
| Dimethyl nonane | - | - | - | - | 1029 | - | - | nd | tr | nd | nd | tr | tr | nd | 0.12 | 0.12 |
| Methyl decane | - | - | - | - | 1038 | - | - | nd | tr | nd | nd | tr | tr | nd | 0.1 | tr |
| Dimethyldecane | - | - | - | - | 1062 | - | - | nd | 0.34 | tr | 0.12 | 0.3 | 0.36 | nd | 0.5 | 0.44 |
| Dimethylundecane | - | - | - | - | 1231 | - | - | nd | 0.24 | tr | nd | 0.17 | 0.24 | nd | 0.3 | 0.27 |
| Methyldodecane | - | - | - | - | 1283 | - | - | nd | 0.36 | 0.12 | nd | 0.32 | 0.33 | nd | 0.46 | 0.42 |
| Dimethyldodecane | - | - | - | - | 1284 | - | - | 0.19 | 0.78 | 0.2 | 0.47 | 0.85 | 0.73 | nd | 0.97 | 0.91 |
| Trimethyldodecane | - | - | - | - | 1348 | - | - | nd | 0.57 | 0.11 | 0.34 | 0.51 | 0.53 | nd | 0.66 | 0.20 |
| Trimethyltetradecane | - | - | - | - | 1548 | - | - | nd | 0.58 | 0.27 | 0.51 | 0.43 | 0.55 | nd | 0.81 | 0.67 |
| Trimethylpentadecane | - | - | - | - | 1719 | - | - | nd | 0.55 | 0.35 | 0.61 | 0.67 | 0.56 | nd | 0.68 | 0.63 |
| Tetramethylhexadecane | - | - | - | - | 1758 | - | - | tr | 0.62 | 0.44 | 0.45 | 0.41 | 0.9 | nd | 0.47 | 0.41 |
| Trimethyloctadecane | - | - | - | - | 1934 | - | - | 0.65 | 1.15 | 1.03 | 0.95 | 1.41 | 1.01 | 0.55 | 1.28 | 1.19 |
| Dimethyl heptene | - | - | - | - | 857 | - | - | nd | 0.12 | tr | nd | 0.1 | 0.13 | nd | 0.37 | 0.19 |
| Butyloctanol | - | - | - | - | 1083 | - | - | nd | 0.24 | tr | tr | 0.2 | 0.23 | nd | 0.28 | 0.26 |
| Dimethyl decene | - | - | - | - | 1105 | - | - | nd | 0.23 | tr | nd | 0.18 | 0.23 | nd | 0.39 | 0.34 |
| Tetramethyl-4-piperidone | - | - | - | - | 1124 | - | - | nd | nd | nd | 0.14 | nd | nd | nd | nd | nd |
| 2-Butyl-1-octanol | 3913-02-8 | 1277 | 1851 | - | 1325 | - | - | nd | 0.3 | 0.1 | nd | 0.31 | 0.27 | nd | 0.33 | 0.36 |
| 2-Hexyl-1-octanol | 19780-79-1 | - | 2116 | - | 1334 | - | - | nd | 0.23 | tr | nd | 0.25 | 0.20 | nd | 0.26 | 0.28 |
| 2-Hexyl-1-octanol | 19780-79-1 | - | 2116 | - | 1544 | - | - | nd | 0.18 | tr | nd | 0.2 | 0.17 | 0.28 | 0.21 | 0.21 |
| Isocaryophyllene | 118-65-0 | 1406 | 1587 | - | 1442 | - | - | 0.2 | 0.2 | tr | 0.18 | tr | nd | nd | nd | nd |
| Hexahydrofarnesol | 6750-34-1 | 1571 | - | - | 1683 | - | - | nd | nd | nd | 0.41 | nd | nd | nd | nd | nd |
| Trimethylpentadecan-2-ol | - | - | - | - | 1847 | - | - | 1.79 | 2.85 | 1.86 | 7.5 | 6.35 | 5.06 | nd | tr | nd |
| Trimethylpentadecan-1-ol | - | - | - | - | 1890 | - | - | nd | 1.32 | 0.93 | 3.34 | 2.89 | 2.33 | 3.78 | tr | nd |
| Dibutyl phthalate | 84-74-2 | 1965 | 2680 | 12.02 | - | 0.78 | 0.48 | - | - | - | - | - | - | - | - | - |
| 9,17-Octadecadienol | - | - | - | 12.2 | - | 0.43 | 0.62 | - | - | - | - | - | - | - | - | - |
| Campesterol | 474-62-4 | 3131 | - | - | - | - | - | 2.82 | 1.73 | 1.89 | 2.69 | 2.92 | 1.28 | 8.83 | 3.92 | 4.56 |
| *β*-Sitosterol | 83-46-5 | 3200 | - | - | - | - | - | 16.63 | 13.72 | 16.46 | 15.04 | 18 | 15.15 | 14.84 | 13.05 | 16.57 |
| Total (81, 17, 67) |  |  |  |  |  | 93.71 | 95.47 | 96.1 | 96.97 | 98.5 | 95.44 | 96.49 | 97.88 | 98.01 | 98.02 | 98.7 |

**Supplemental Table 1.** The compounds (%) in the essential oils or CH2Cl2 extracts obtained from *Phlomoides rotata*11,12. RT was gotten by an AT-WAX column12. LRIsa were obtained by a semi-standard apolar column, while LRIsc were obtained by a polar column, which are recorded in the National Institute of Standards and Technology 17 library. LRIsb were gotten by a HP-5 column11. "tr" indicates trace quantities (<0.1%). "nd" indicates that the compound was undetected. The symbols in brackets after each fatty acid represent the number of carbon atoms in the fatty carboxyl chain and the number of double bonds. The "n-" designation indicates the location of the double bond nearest the methyl terminus. The numbers in brackets for each type of compound represent the total number, the number found in reference12, and the number found in reference11, respectively. The identification of the compounds labeled as "debated" is open to discussion11,12.
